# Supplementary material
Source: publisher site journal article supplement (https://kjim.org/upload/media/kjim-2025-058-Supplementary-Table-1.pdf)
Supplement: Supplementary file 1 [file kjim-2025-058-Supplementary-Table-1.pdf]

**Supplementary Table 1. Clinical characteristics of study patients**

| Variable                                              | Total<br>(N = 606) | Successful extubation<br>(N = 446) | Failed extubation<br>(N = 160) | <i>p</i> value |
|-------------------------------------------------------|--------------------|------------------------------------|--------------------------------|----------------|
| At the day of extubation                              |                    |                                    |                                |                |
| Ventilator mode before the extubation                 |                    |                                    |                                | 0.32           |
| Assist-control ventilation                            | 15 (2.5)           | 10 (2.2)                           | 5 (3.1)                        |                |
| Pressure-support ventilation                          | 409 (67.5)         | 308 (69.1)                         | 101 (63.1)                     |                |
| Continuous positive airway pressure                   | 182 (30.0)         | 128 (28.7)                         | 54 (33.8)                      |                |
| Pressure-support level (cmH <sub>2</sub> O)           | 5 [0–7]            | 5 [0–7]                            | 5 [0–7]                        | 0.77           |
| Positive end-expiratory pressure (cmH <sub>2</sub> O) | 5 [5–6]            | 5 [5–6]                            | 5 [5–6]                        | 0.004          |
| Tidal volume                                          |                    |                                    |                                |                |
| mL                                                    | 456 ± 155          | 462 ± 158                          | 439 ± 146                      | 0.10           |
| mL/kg                                                 | 8.0 ± 2.5          | 8.1 ± 2.5                          | 7.8 ± 2.6                      | 0.22           |
| FiO <sub>2</sub>                                      | 0.3 [0.3–0.4]      | 0.3 [0.2–0.3]                      | 0.3 [0.3–0.4]                  | < 0.001        |
| Bicarbonate (mmol/L)                                  | 26.4 ± 3.9         | 26.3 ± 3.8                         | 26.5 ± 4.4                     | 0.72           |
| Lactate (mmol/L)                                      | 1.5 [1.1–2.2]      | 1.5 [1.1–2.1]                      | 1.7 [1.2–2.5]                  | 0.01           |
| Type of SBT                                           |                    |                                    |                                | > 0.99         |
| Continuous positive airway pressure                   | 56 (9.2)           | 41 (9.2)                           | 15 (9.4)                       |                |
| T-piece or HFNO                                       | 482 (79.5)         | 355 (79.6)                         | 127 (79.4)                     |                |
| Low level of pressure support                         | 21 (3.5)           | 16 (3.6)                           | 5 (3.1)                        |                |
| No SBT                                                | 47 (7.8)           | 34 (7.6)                           | 13 (8.1)                       |                |
| Duration of SBT (min)                                 | 42 [31–105.5]      | 42 [31–105]                        | 43 [31–116.5]                  | 0.66           |
| Reconnection to ventilator before extubation          | 312 (51.5)         | 238 (53.4)                         | 74 (46.2)                      | 0.15           |

Values are presented as frequency (%), median [interquartile range], or mean ± standard deviation as appropriate.

FiO<sub>2</sub>, fraction of inspired oxygen; SBT, spontaneous breathing trial; HFNO, high flow nasal oxygen.
